# Supplementary material for: Attenuated Salmonella carrying plasmid co-expressing HPV16 L1 and siRNA-E6 for cervical cancer therapy
Source: PubMed Central journal article supplement (PMC8505555; doi:10.1038/s41598-021-99425-3), 2021-10-11
Supplement: 41598_2021_99425_MOESM1_ESM.pdf [file 41598_2021_99425_MOESM1_ESM.pdf]

**Attenuated Salmonella carrying plasmid co-expressing HPV16 L1 and siRNA-E6 for cervical cancer therapy**

**Junyu Chen<sup>1,2</sup>, Shuhua Zhao<sup>2</sup>, Wenxi Tan<sup>2</sup>, Taiwei Wang<sup>1</sup>, Shan Wu<sup>3</sup>, Changshuai Wang<sup>1</sup>, Yu Jiang<sup>1</sup>, Tuo Zhou<sup>1</sup>, Zhuo Zhang<sup>1</sup>, Lijing Zhao<sup>1\*</sup>**

<sup>1</sup>Department of Rehabilitation, School of nursing, Jilin University, Changchun, China

<sup>2</sup>Department of Gynecology, Second Hospital, Jilin University, Changchun, China

<sup>3</sup>Key Laboratory of Reproductive Genetics (Ministry of Education) and Department of Reproductive Endocrinology, Women's Hospital, Zhejiang University, School of Medicine, Zhejiang, China

\*Correspond to Lijing Zhao,

Email address: [zhao\\_lj@jlu.edu.cn](mailto:zhao_lj@jlu.edu.cn)

Postal address: 965 Xinjiang Street, Changchun City, China.

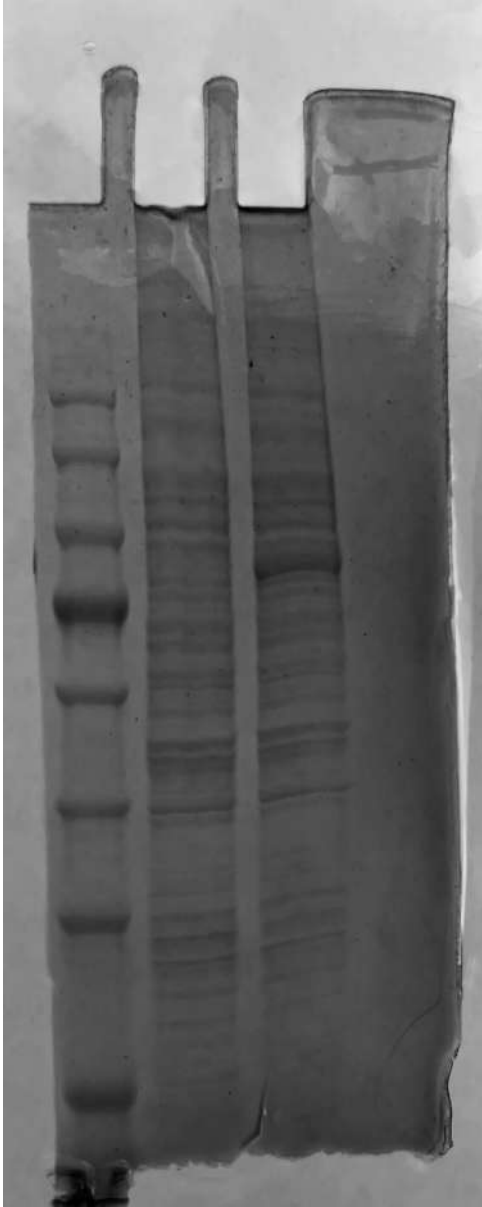

Figure 1C

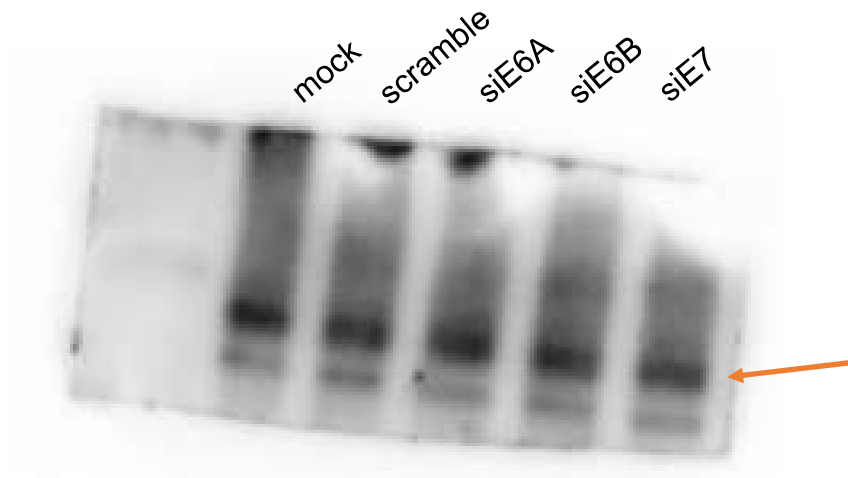

$\beta$ -actin for the Cells figure 3C

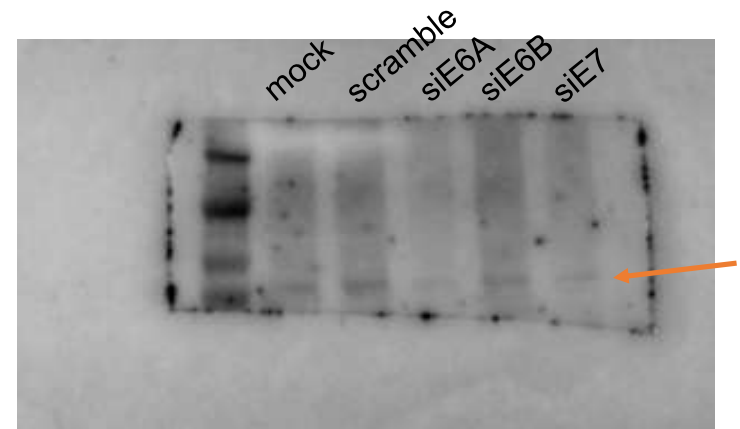

E6 for the Cells figure 3C

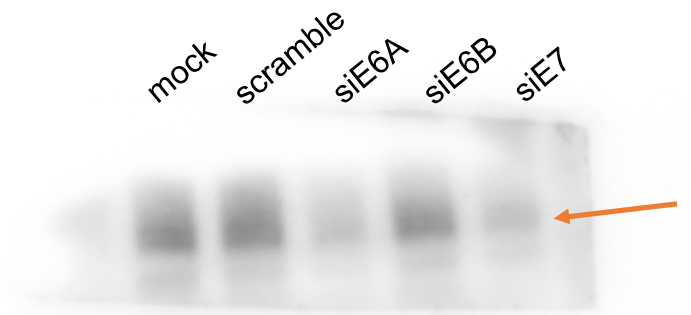

E7 for the Cells figure 3C

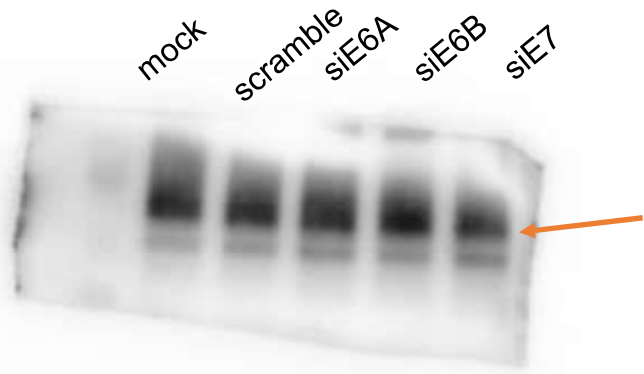

β-actin for the Cells figure 4G

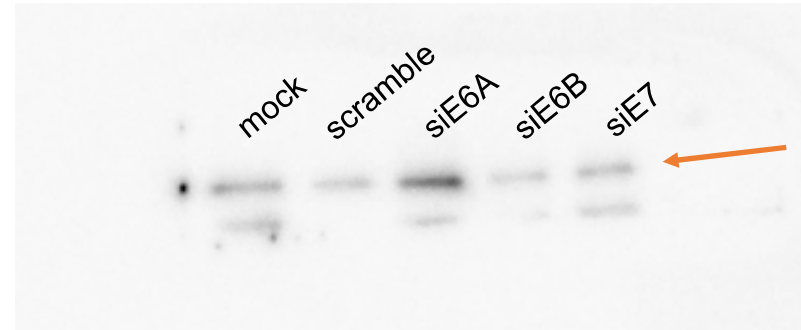

P53 for the Cells figure 4G

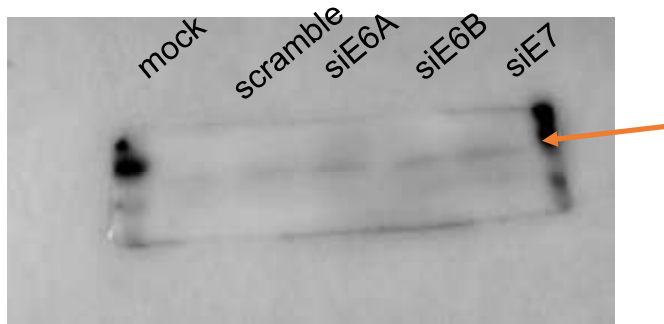

Bax for the Cells figure 4G

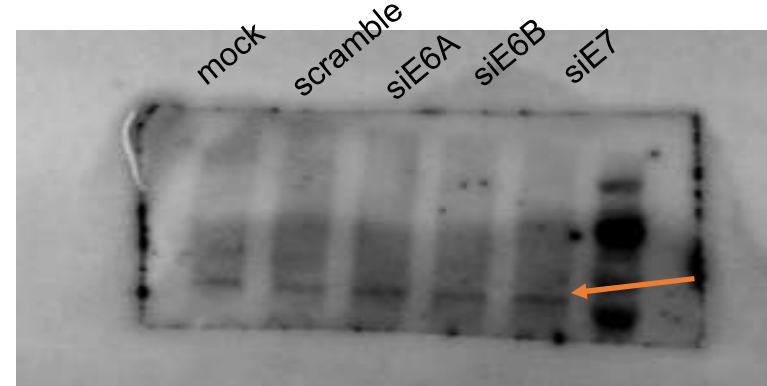

Caspase9 for the Cells figure 4G

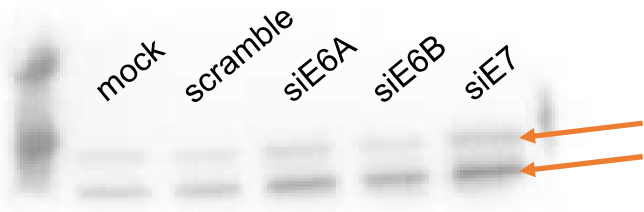

C-Caspase3 for the Cells figure 4G
